# Supplementary material for: Enzymes in a golden cage
Source: Royal Society of Chemistry journal article supplement (doi:10.1039/c9sc05419g), 2020-01-01
Supplement: c9sc05419g1.pdf [file c9sc05419g1.pdf]

## Enzymes in a golden cage

Yael Baruch-Shpigler and David Avnir

Institute of Chemistry and the Center for Nanoscience and Nanotechnology, The Hebrew University  
of Jerusalem, Jerusalem 9190401, Israel

### Supplementary Material

#### 1. The enzymatic reactions of this study

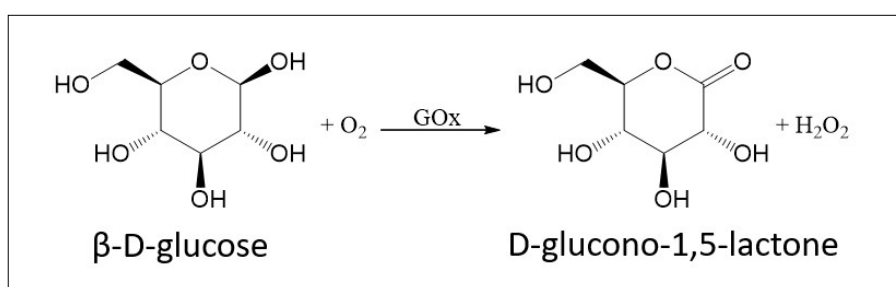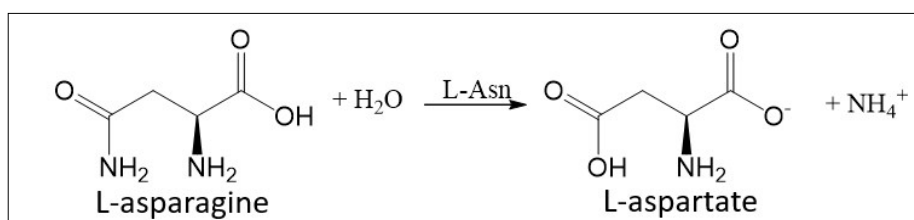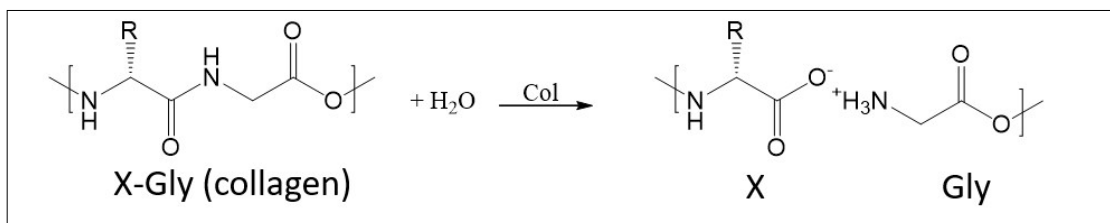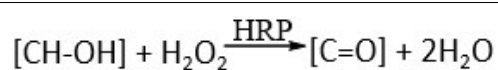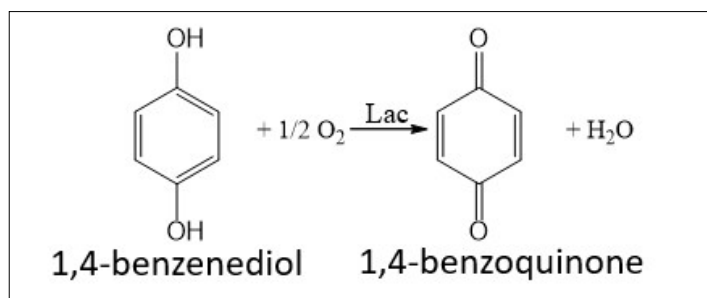

**Figure S1** – Bio-reactions of each of the entrapped enzymes. From top to bottom: GOx, L-Asp, Col, HRP and Lac.

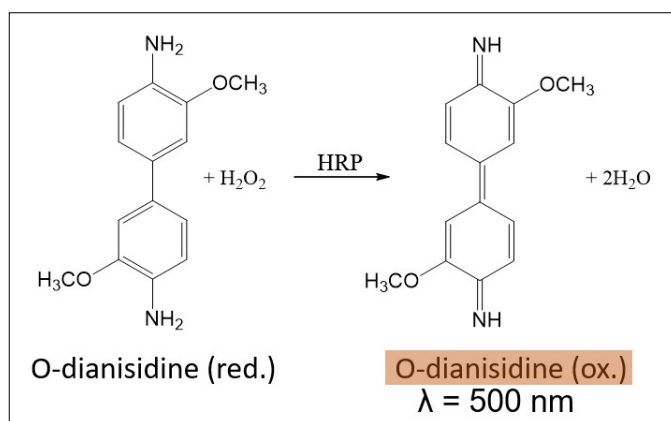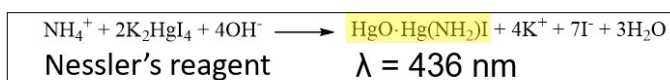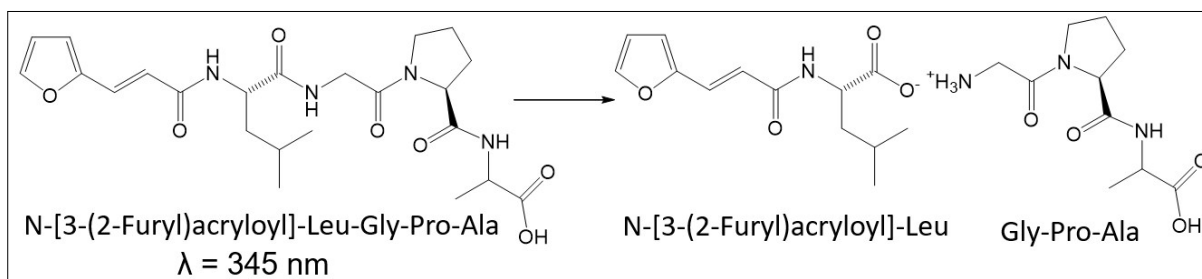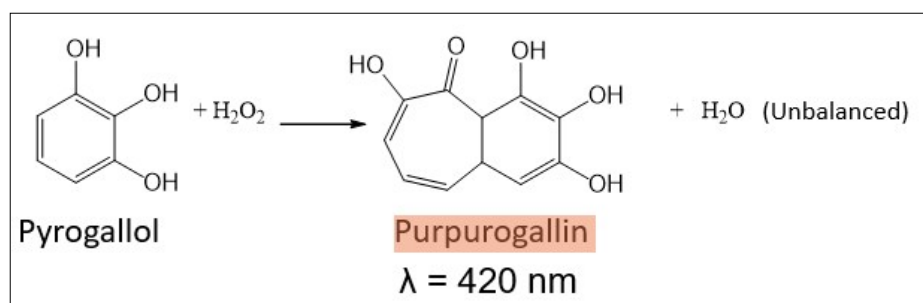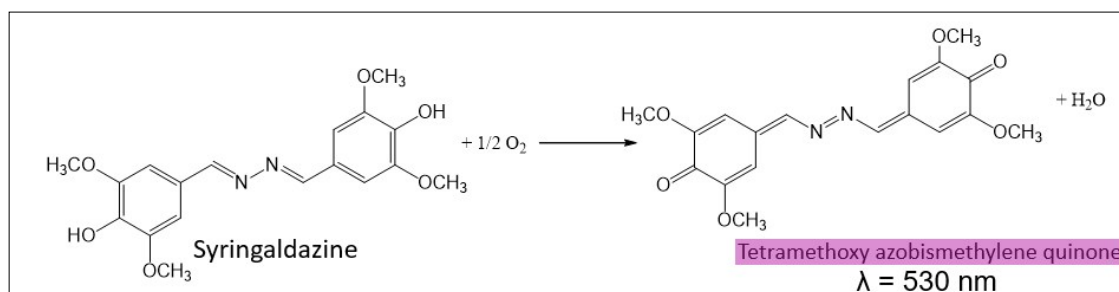

**Figure S2** – The analytical reactions for the detection of each of the activity of each of the entrapped enzymes. From top to bottom: GOx, L-Asp, Col, HRP and Lac.

## 2. Surface maps of proteins

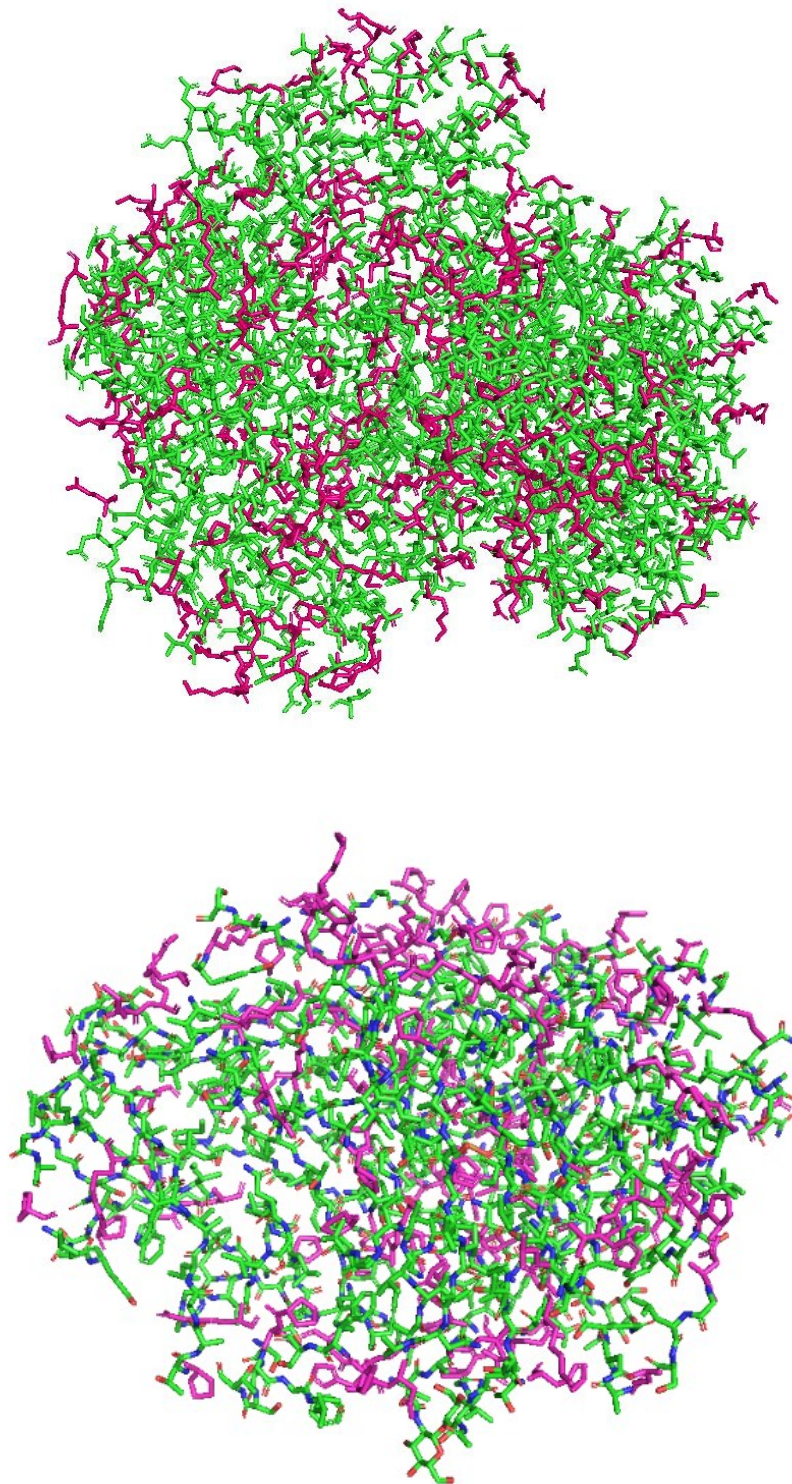

**Figure S3** – Surface maps of L-asparaginase (top, PDB 6EOK) and laccase (bottom, PDB 1GYC ):  
the residues with thiols, amines and carboxylates are indicated in pink

### 3. Additional materials characterization data

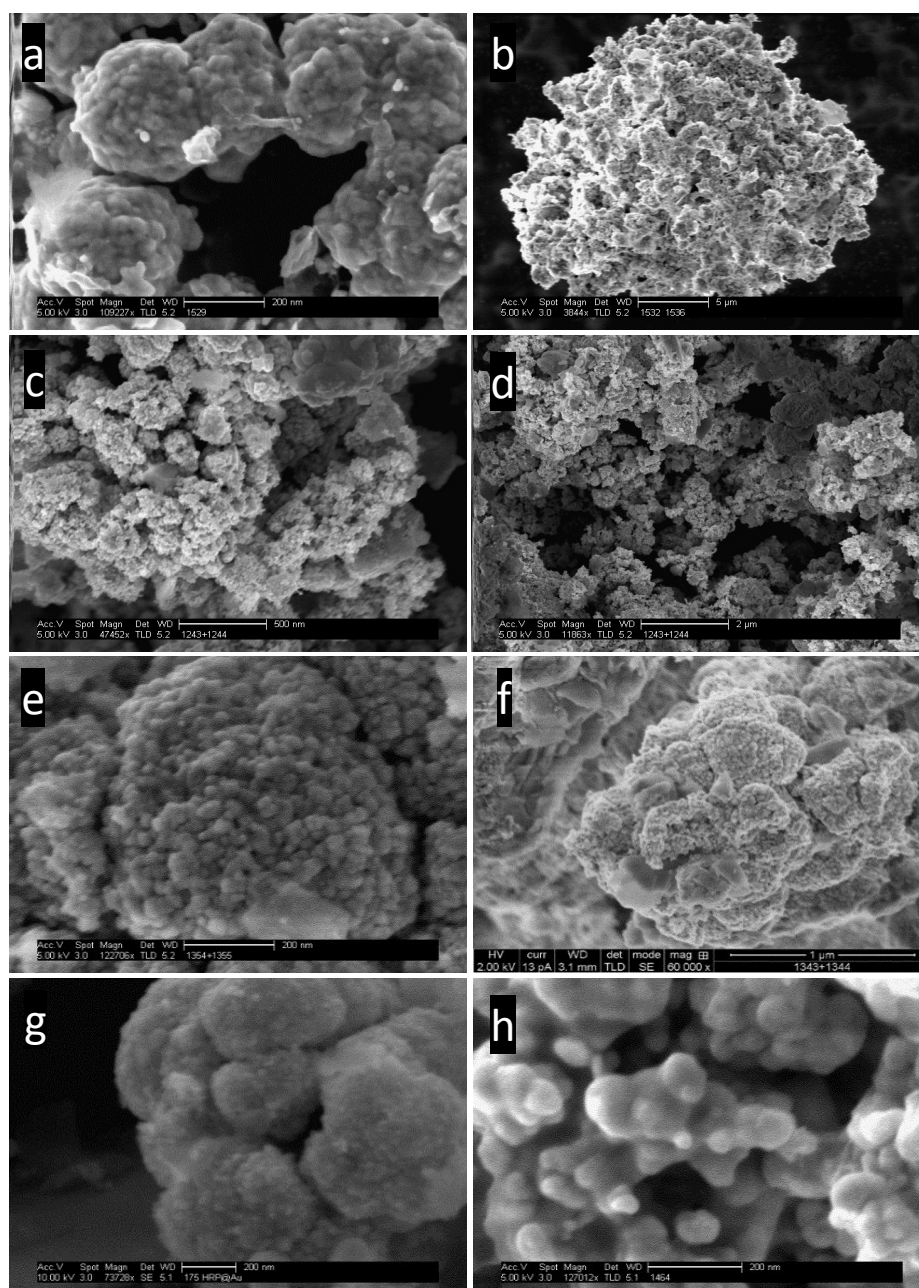

**Figure S4** – HR-SEM images: GOx@Au: (a) bar = 200 nm; (b) bar = 5 μm. Asp@Au: (c) bar = 200 nm; (d) bar = 2 μm. (e) Col@Au: bar = 200 nm; (f) bar = 1 μm. (g) HRP@Au: bar = 200 nm. (h) Lac@Au: bar = 200 nm

**Table S1** – Gold crystallite sizes of the composites from XRD

| Composite | Average gold crystallite size |
|-----------|-------------------------------|
| Asp@Au    | 14 nm                         |
| GOx@Au    | 16 nm                         |
| Col@Au    | 8 nm                          |
| Lac@Au    | 45 nm                         |
| Pure Gold | 16 nm                         |

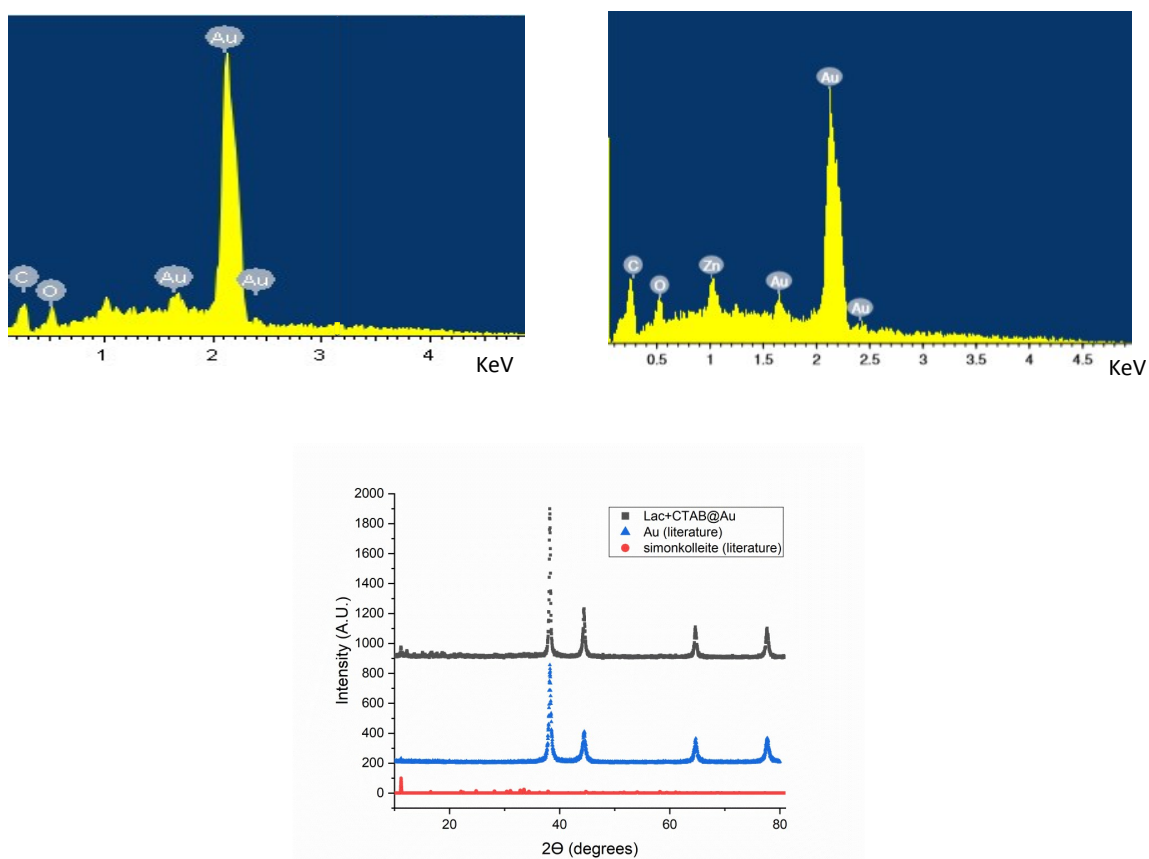

**Figure S5** – Top: EDX spectra of Asp@Au (left) and Col@Au (right; residual traces of the reducing agent, Zn(OH)<sub>2</sub> are seen). Bottom: XRD of Lac@Au (black), Au (literature, blue). Traces of simonkolleite (literature, red) are seen.

### 3. Glucose oxidase kinetics in solution

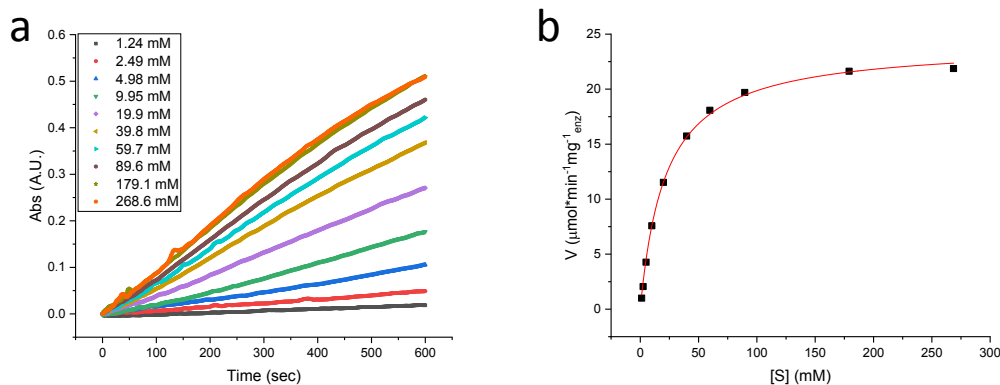

**Figure S6** - Kinetics of free GOx in solution: (a) Initial rates as a function of the concentration of the substrate. (b) Fitting this data to the Michaelis-Menten model.

### 4. Collagenase: Additional observations

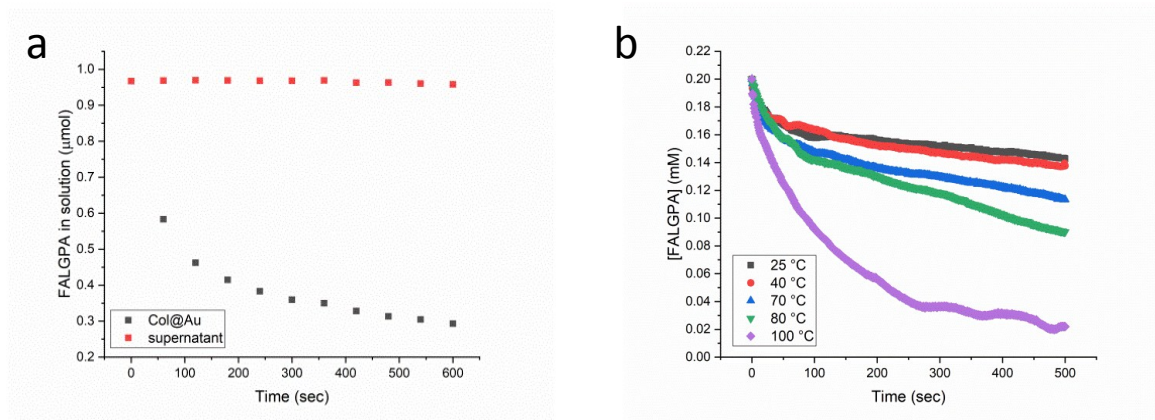

**Figure S7** – (a) Activity of Col@Au, and zero activity of the supernatant solution. (b) Activity after heating the dry powder of Col@Au to the indicated temperature. We attribute the increase at 100 °C to pore widening due to coalescence of the Au nanocrystal building blocks.

## 5. Asparaginase – additional experiments

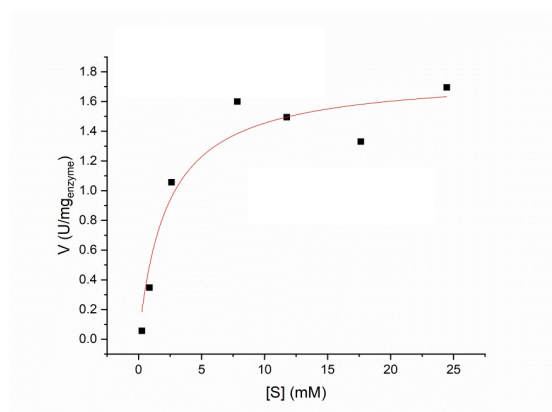

**Figure S8** – Michaelis-Menten analysis of free L-Asp in solution

**Testing for supernatant activity of Asp@Au** was conducted in a different manner than for the composite, because even if enzyme leaked, it couldn't possibly stay active under the highly alkaline environment caused by Nessler's reagent. In order to establish that there was not enzyme leaking from the, it was soaked in 1.5 mL TDW for 30 minutes. The water was then measured for absorbance (in order to establish a blank measurement) and subsequently mixed with L-asparagine, the substrate for the enzyme, for 30 seconds, before injecting the Nessler's reagent and measuring the ensuing absorbance. The following change in absorbance was minute and at a base line level: from 0.0015 to 0.0029.
